# Supplementary material for: V2Al5Ge5: first ternary intermetallic in the V–Al–Ge system accessible in liquid aluminium
Source: Royal Society of Chemistry journal article supplement (doi:10.1039/b404035j), 2004-01-01
Supplement: b404035j.doc [file b404035j.doc]

***Colour Figure.*** Structure of V2Al5Ge5 (top) viewed down the *a* axis highlighting pentagonal columns. (bottom) Al atoms removed for clarity to show identical “V2Ge5” column running, down the *a* axis.
